# Supplementary material for: Dorsal clock neurons in Drosophila sculpt locomotor outputs but are dispensable for circadian activity rhythms
Source: PubMed Central journal article supplement — iScience. 2021 Aug 19;24(9):103001. doi: 10.1016/j.isci.2021.103001 (PMC8413890; doi:10.1016/j.isci.2021.103001), 2021-08-19
Supplement: mmc1.pdf [file mmc1.pdf]

iScience, Volume 24

## **Supplemental information**

**Dorsal clock neurons in *Drosophila* sculpt  
locomotor outputs but are dispensable  
for circadian activity rhythms**

**Ella A. Nettnin, Thomas R. Sallese, Anita Nasser, Sumit Saurabh, and Daniel J. Cavanaugh**

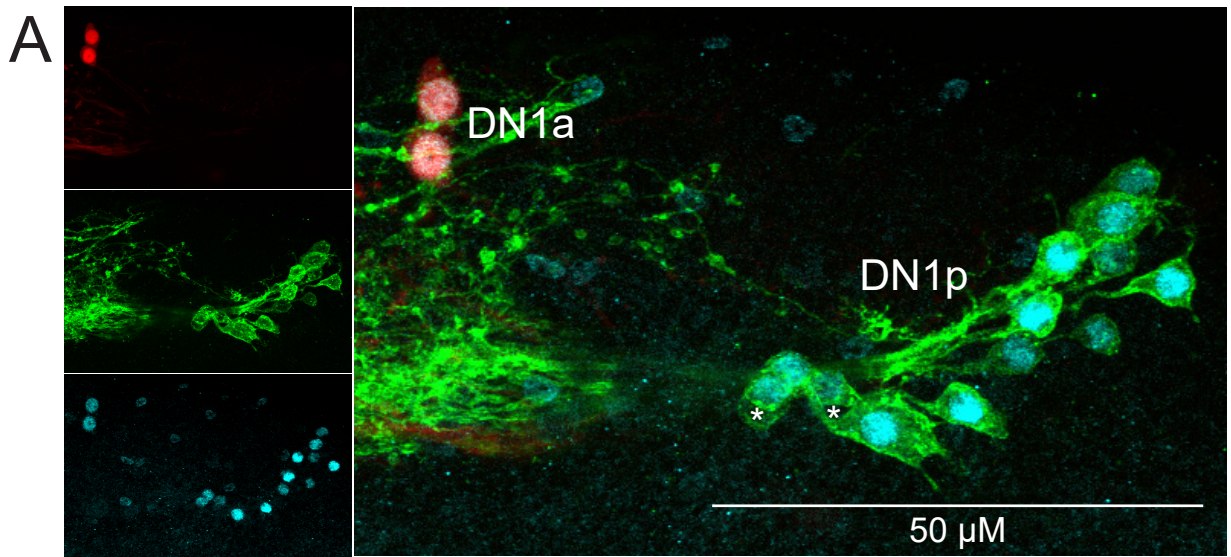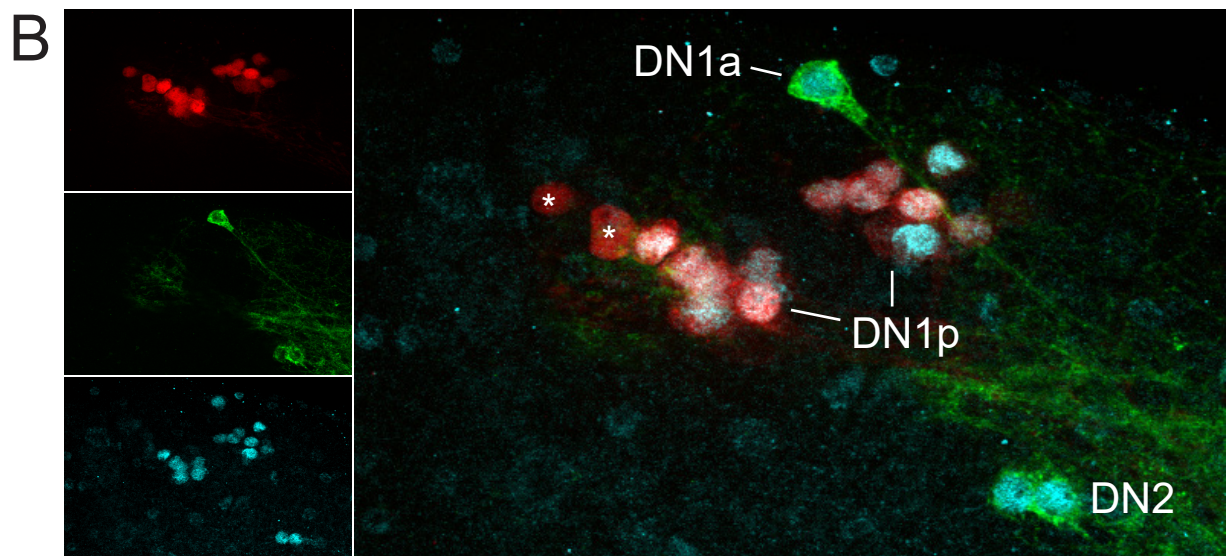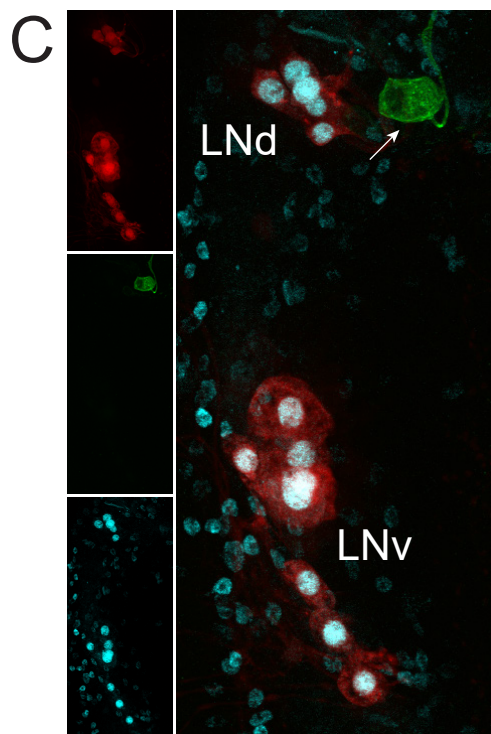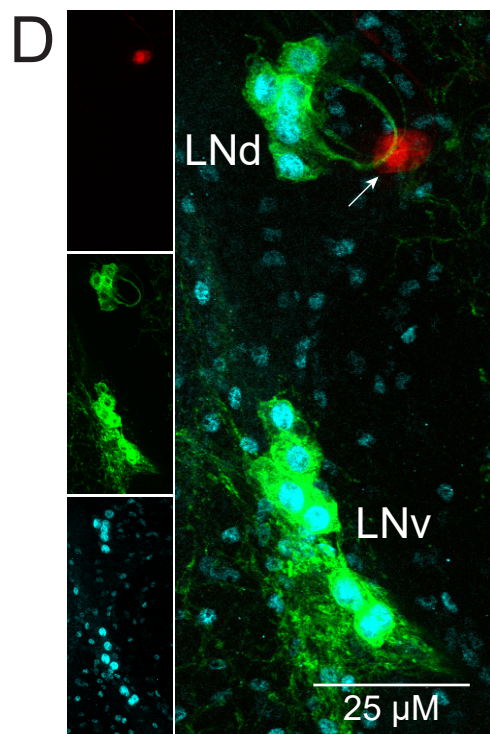

**Figure S1. Intersectional Genetic Strategy Comprehensively Labels DN1p Cells, Related to Figure 2**

(A) Representative maximum projection confocal image of the dorsal region of a DN1p Flip-In brain co-stained for mCherry (red; top left) Kir2.1<sup>eGFP</sup> (green; middle left), and PER (cyan; bottom left). A merged image is shown on the right. Note that all PER<sup>+</sup> DN1p cells are labeled with Kir2.1<sup>eGFP</sup>, confirming that our intersectional approach comprehensively labels DN1p cells. There are additionally 2 GFP<sup>+</sup> cells (marked by asterisks) which are not co-labeled by PER. In this brain, mCherry labels 2 DN1a cells, which are also PER<sup>+</sup>. (B) Representative maximum projection confocal image of the dorsal region a DN1p Flip-Out brain co-stained for mCherry (red; top left) Kir2.1<sup>eGFP</sup> (green; middle left), and PER (cyan; bottom left). A merged image is shown on the right. All PER<sup>+</sup> DN1p cells are co-labeled with mCherry, indicating efficient and comprehensive recombination in DN1p cells. There are also 2 mCherry<sup>+</sup> cells (marked by asterisks) which are not PER<sup>+</sup>. (C-D) Representative maximum projection confocal images of the ventrolateral region of DN1p Flip-In (C) and Flip-Out (D) brains co-stained for mCherry (red; top left) Kir2.1<sup>eGFP</sup> (green; middle left), and PER (cyan; bottom left). Note that the Flip-In and Flip-Out approaches label a single PER<sup>-</sup> cell (indicated by the arrow) in the vicinity of the LN<sub>d</sub> clock neurons. This cell is Kir2.1<sup>eGFP</sup><sup>+</sup> in the Flip-In brain (C) and mCherry<sup>+</sup> in the Flip-Out brain (D).

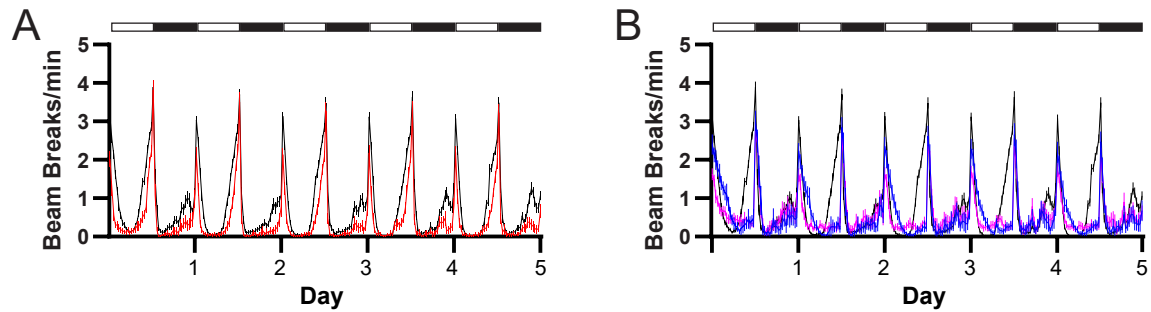

**Figure S2. Kir2.1<sup>eGFP</sup> Expression in DN1p Cells Reduces Overall Activity Levels Without Affecting Anticipatory Activity in Light-Entrained Conditions, Related to Figure 5**

(A) Mean number of DAM beam breaks/min ( $\pm$  95% confidence interval) is plotted over 5 days in LD conditions for DN1p Flip-in Flies (red) compared to control flies (black). (B) Mean DAM beam breaks/min is plotted as in (A) for DN1p Flip-Out flies (blue), flies in which all Clk856+ clock neurons are silenced with Kir2.1<sup>eGFP</sup> (pink), and control flies (black). The same control data are graphed in (A) and (B) and consists of a combination of 3 control lines lacking Kir2.1<sup>eGFP</sup> expression (see Methods). White and black bars indicate light and dark periods, respectively. Note that DN1p Flip-In flies have reduced activity levels compared to controls during both the day and night, but retain morning and evening anticipatory activity (ramping up activity prior to light transitions).

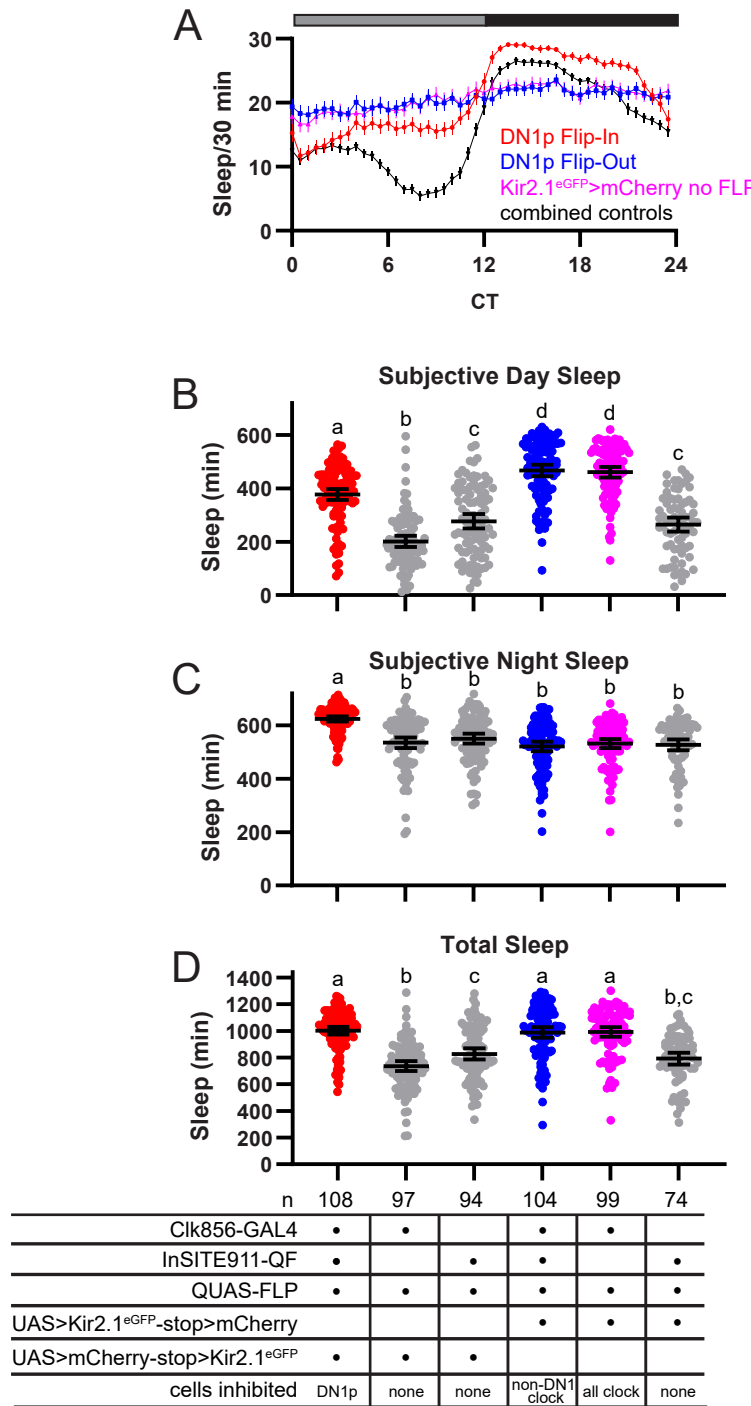

**Figure S3. Kir2.1<sup>eGFP</sup> Expression in DN1p Cells Increases Sleep Duration in DD Conditions, Related to Figure 6**

(A) Mean sleep/30 min ( $\pm$  95% confidence interval) over the course of a 24-hr day is plotted for DN1p Flip-In flies (red), DN1p Flip-Out flies (blue), flies in which all Clk856-GAL4+ clock cells are silenced (pink), and control flies (black). Control plot consists of data from a combination of 3 control lines lacking Kir2.1<sup>eGFP</sup> expression (see Methods). Data are averaged over 5 days in DD conditions. Grey and black bars indicate subjective day and subjective night, respectively. (B-D) Total subjective day, subjective night, or 24-hr sleep is plotted for the indicated genotypes. Lines are means  $\pm$  95% confidence intervals. Dots represent individual flies. Different letters indicate significant difference ( $p < 0.05$ ), Tukey's multiple comparisons test following one-way ANOVA. The same letter indicates no significant different ( $p > 0.05$ ).

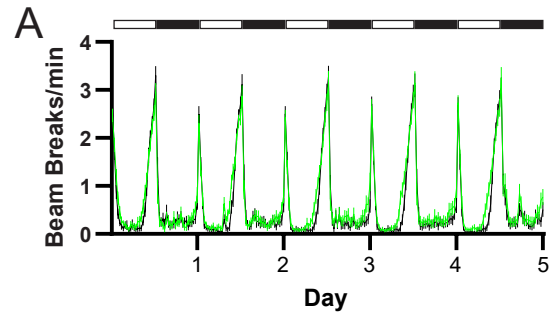

**Figure S4. *Kir2.1<sup>GFP</sup>* Expression in DN1a Cells Prolongs Evening Anticipatory Activity and Enhances Morning Anticipatory Activity in Light-Entrained Conditions, Related to Figure 9**

(A) Mean number of DAM beam breaks/min ( $\pm$  95% confidence interval) is plotted over 5 days in LD conditions for experimental flies with *spl-DN1a-GAL4*-driven expression of *Kir2.1<sup>GFP</sup>* (green) and control flies with *spl-DN1a-GAL4*-driven *mCherry* (black). Note that silencing of DN1a cells causes prolonged evening anticipatory activity (preceding lights-off), starting earlier in the evening than control flies, and also increases the slope and magnitude of morning anticipatory activity (preceding lights-on).

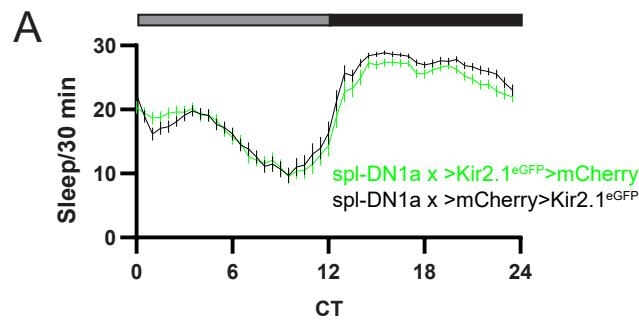

**B** Subjective Day Sleep

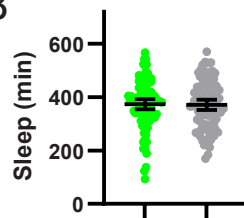

**C** Subjective Night Sleep

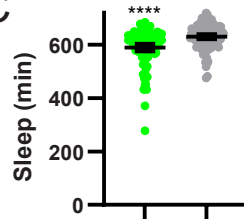

**D** Total Sleep

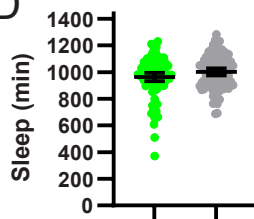

|                                          | n | 93 | 93 |
|------------------------------------------|---|----|----|
| spl-DN1a-GAL4                            | • | •  |    |
| UAS>Kir2.1 <sup>eGFP-stop</sup> >mCherry | • |    |    |
| UAS>mCherry-stop>Kir2.1 <sup>eGFP</sup>  |   |    | •  |

**Figure S5. Kir2.1<sup>eGFP</sup> Expression in DN1a Cells Decreases Sleep Duration in DD Conditions, Related to Figure 10**

(A) Mean sleep/30 min ( $\pm$  95% confidence interval) over the course of a 24-hr day is plotted for flies with spl-DN1a-GAL4-driven expression of Kir2.1<sup>eGFP</sup> (green) and control flies with spl-DN1a-GAL4-driven mCherry (black). Data are averaged over 5 days in DD conditions. Grey and black bars indicate subjective day and night, respectively. (B-D) Total daytime, nighttime, or 24-hr sleep is plotted for the indicated genotypes. Lines are means  $\pm$  95% confidence intervals. Dots represent individual flies. \*\*\*\* $p$  < 0.0001, t-test.
